# Supplementary material for: Indole Propionic Acid Increases T Regulatory Cells and Decreases T Helper 17 Cells and Blood Pressure in Mice with Salt-Sensitive Hypertension
Source: MDPI journal article supplement (doi:10.3390/ijms24119192), 2023-05-24
Supplement: s1 [file s1]

## Supplementary Materials

Indole Propionic Acid Increases T Regulatory Cells and Decreases T Helper 17 Cells and Blood Pressure in Mice with Salt Sensitive Hypertension

## DISCLOSURES

Robert C. Alaniz is a founder and holds equity in TlaloC Therapeutics Inc., which is commercializing microbiota therapeutics. The remaining authors have declared that no conflict of interest exists.

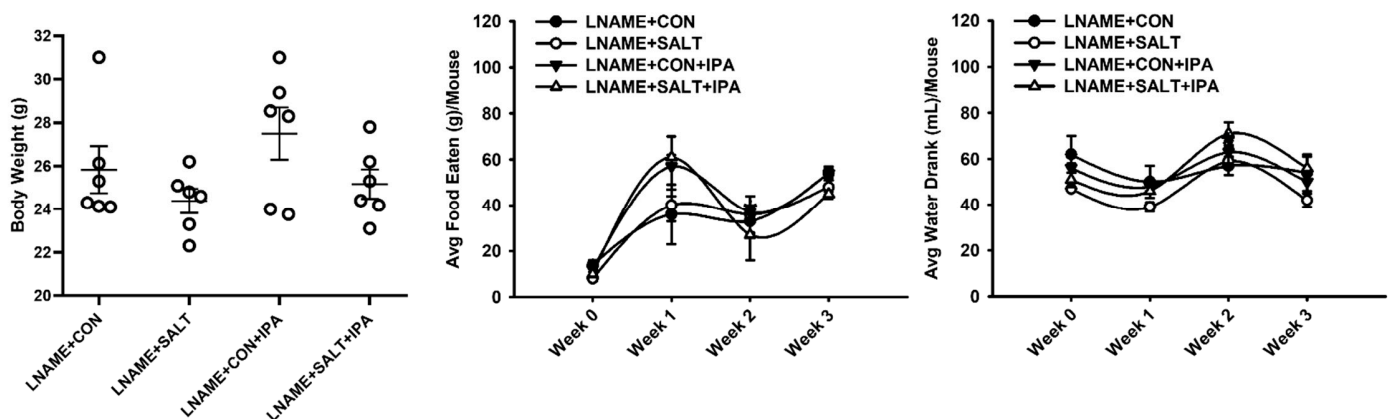

**Supplemental Figure S1. Dietary IPA supplementation does not alter body weight, food intake, and water intake in LSHTN mice.** Body weights, average food intake, and average water intake in littermates with and without LSHTN and with and without IPA treatment (n=6 per group). Statistical analyses between groups were performed with a Student's t-test.

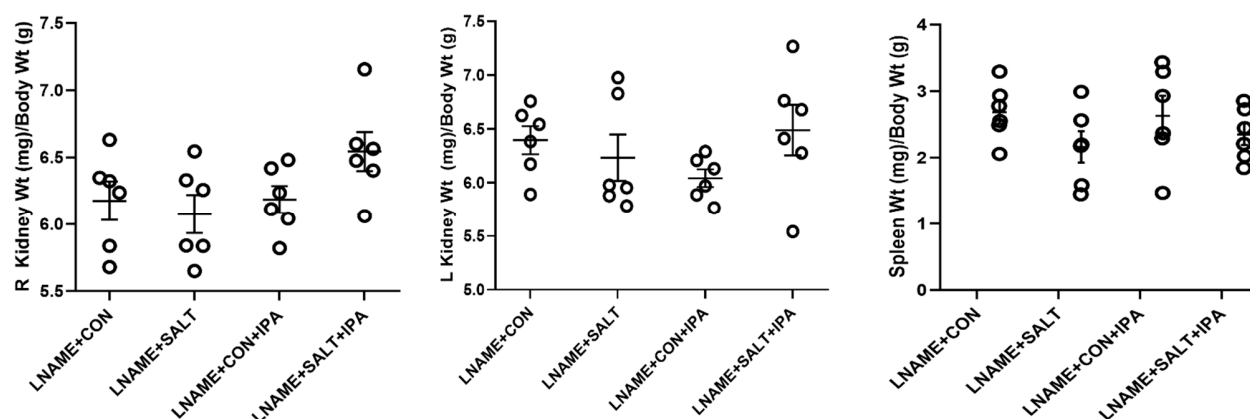

**Supplemental Figure S2. Dietary IPA supplementation does not alter kidney or spleen weights in LSHTN mice.** Weights of the right kidney, left kidney, and spleen in littermates with and without LSHTN and with and without IPA treatment (n=6 per group). Statistical analyses between groups were performed with Student's t-test.

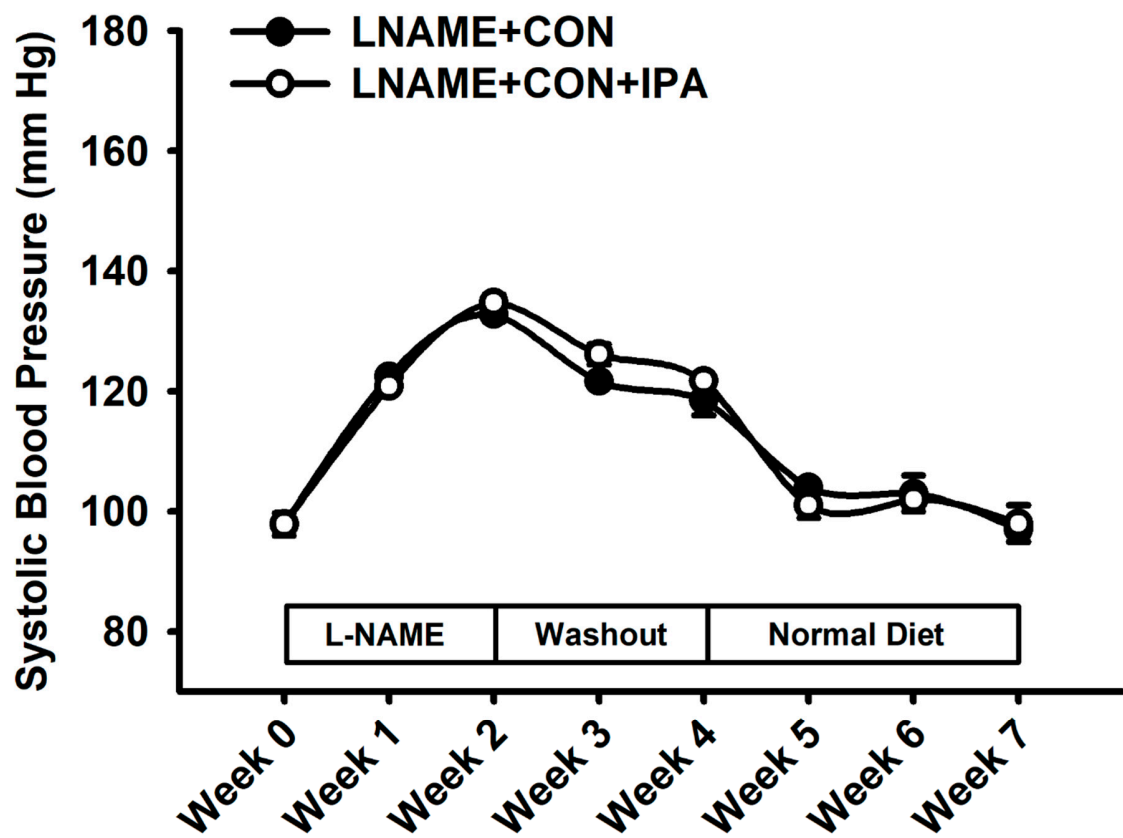

**Supplemental Figure S3. In normotensive mice, dietary IPA supplementation has no effect on systolic blood pressure.** Systolic blood pressure measurements in mice with and without dietary IPA treatment (n=4 per group). Statistical analyses were performed with Student's t-test.

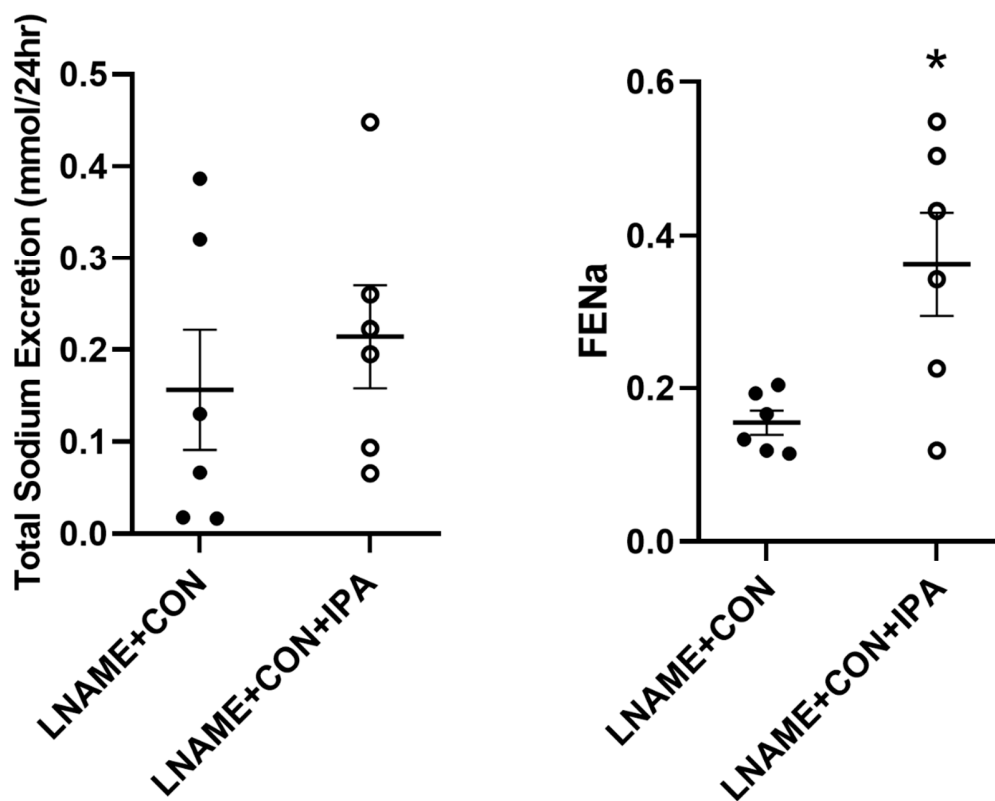

**Supplemental Figure S4. In normotensive mice, dietary IPA supplementation does not alter urinary total sodium excretion and increases fractional excretion of sodium.** Urinary total sodium excretion and FENa in mice with and without dietary IPA treatment (n=6 per group). Statistical analyses were performed with Student's t-test.

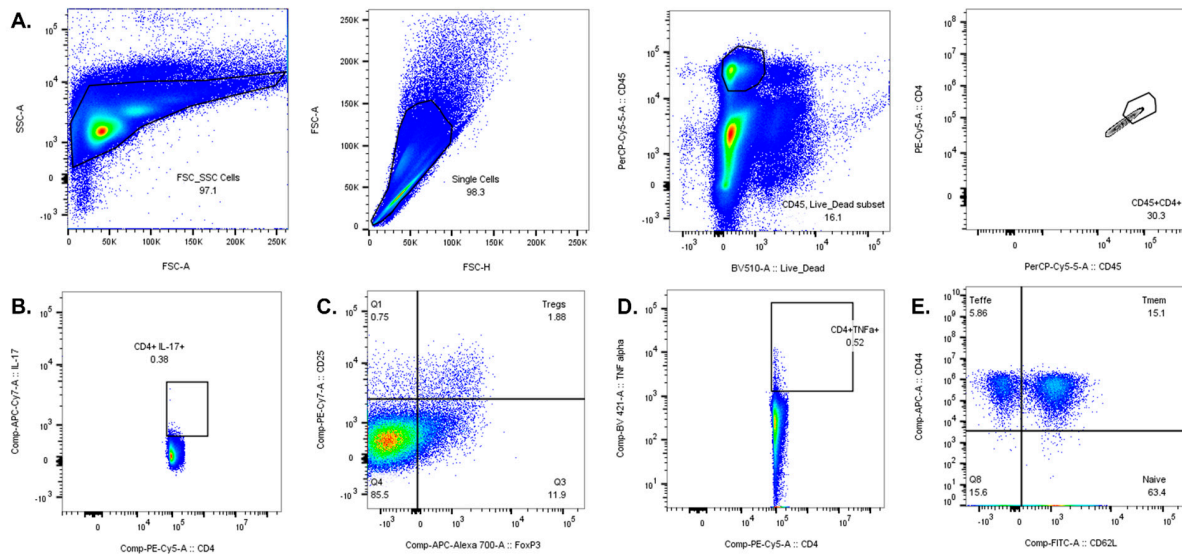

**Supplemental Figure S5. Gating strategy for CD4+ T cell subsets in the kidney and spleen.** (A) Cells were gated to select for live, singlet CD45+CD4+ cells. Then, cells were gated for (B) Th17 cells, (C) Treg cells, (D) T helper 1 cells, (E) naïve T cells, effector T cells, and memory T cells.

## Kidney

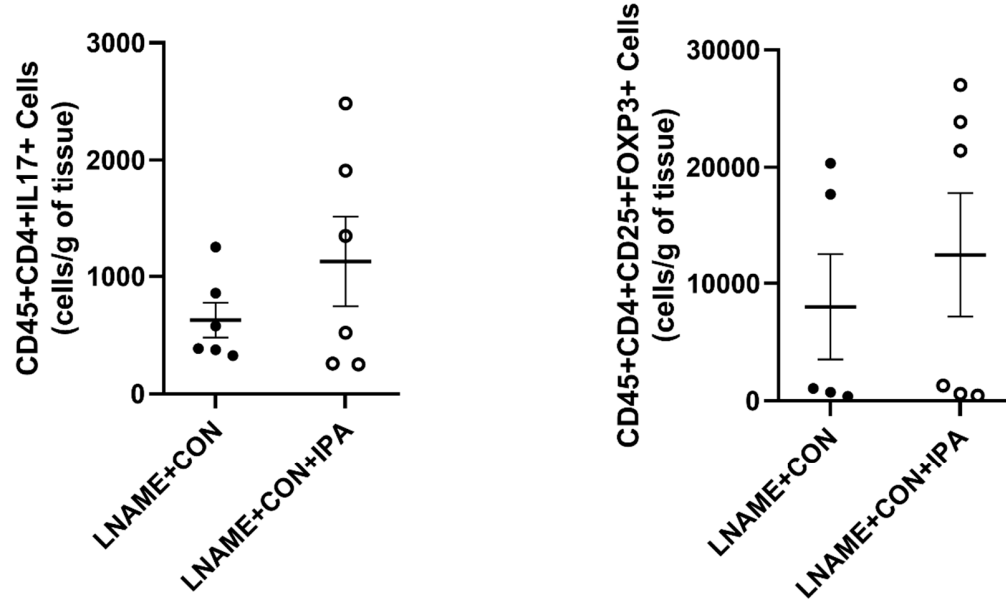

## Spleen

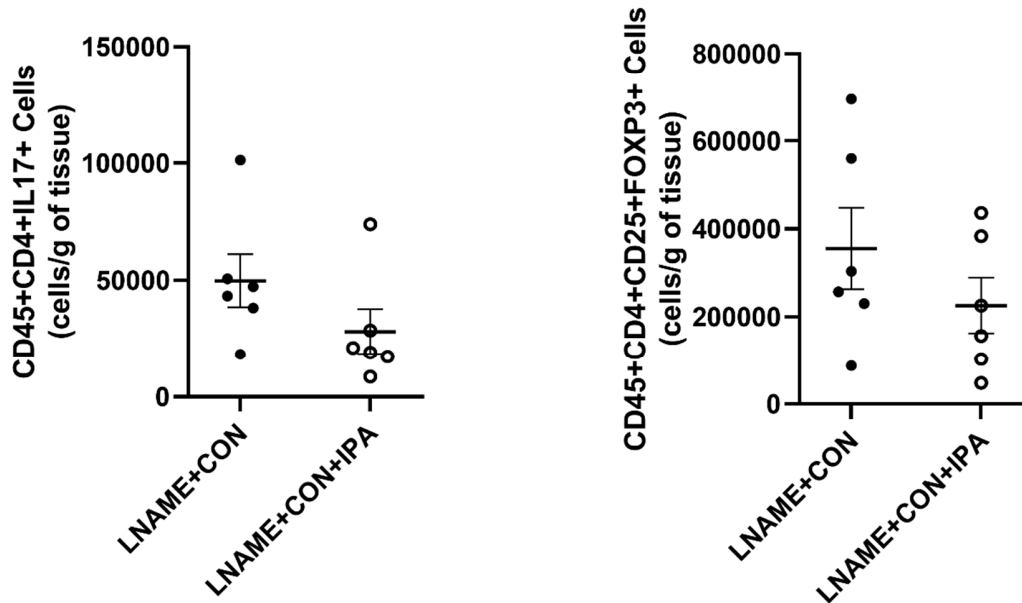

**Supplemental Figure S6. In normotensive mice, dietary IPA supplementation does not alter Th17 or Treg populations in the kidney or spleen.** Th17 and Treg cell populations in mice with and without dietary IPA treatment (n=6 per group). Statistical analyses were performed with Student's t-test.

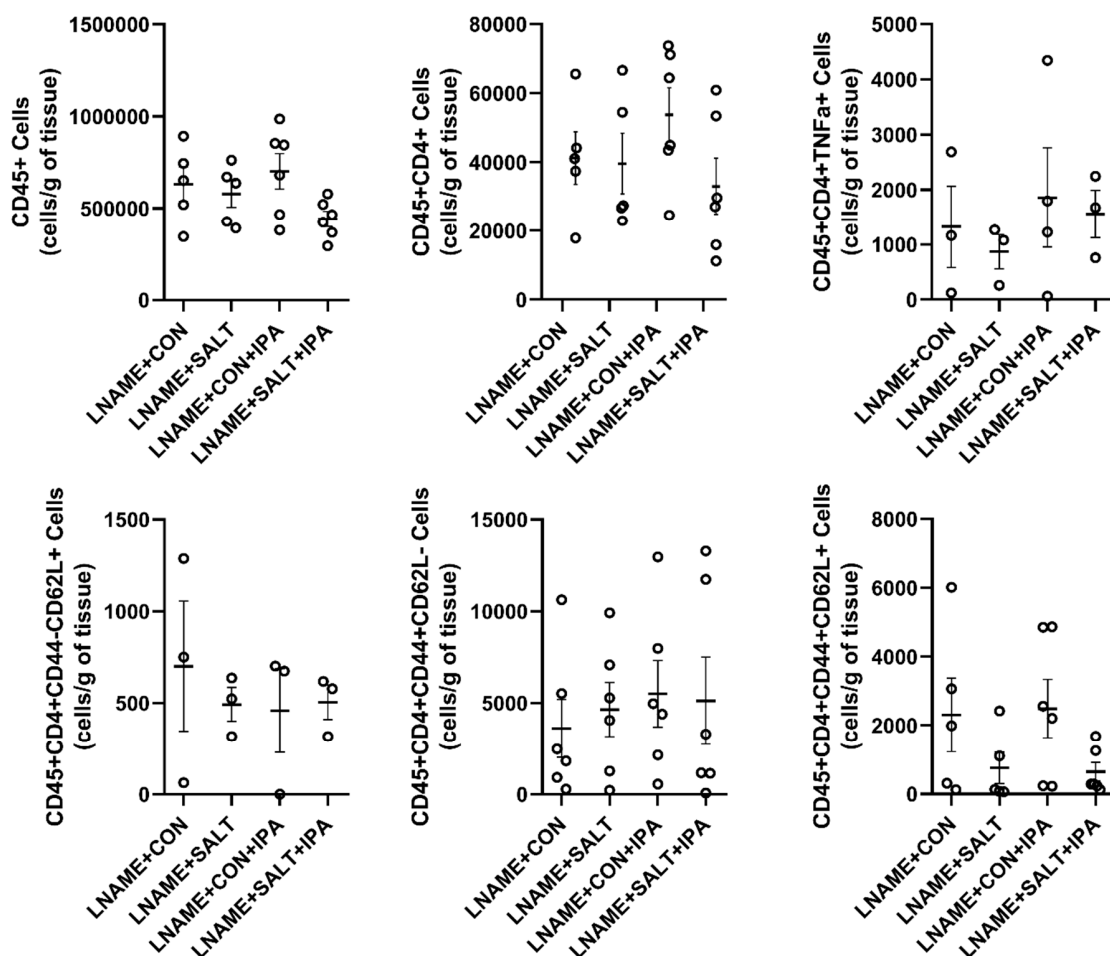

**Supplemental Figure S7. Supplementation of IPA in mice with LSHTN does not alter renal T cell populations.** Populations of renal immune cells, T helper cells, T helper 1 cells, naïve T cells, effector T cells, and memory T cells in mice with and without LSHTN and with and without dietary IPA supplementation (n=3-6 per group). There were no significant differences between LNAME+CON and LNAME+CON+IPA or LNAME+SALT and LNAME+SALT+IPA. Statistical analyses were performed with Student's t-test.

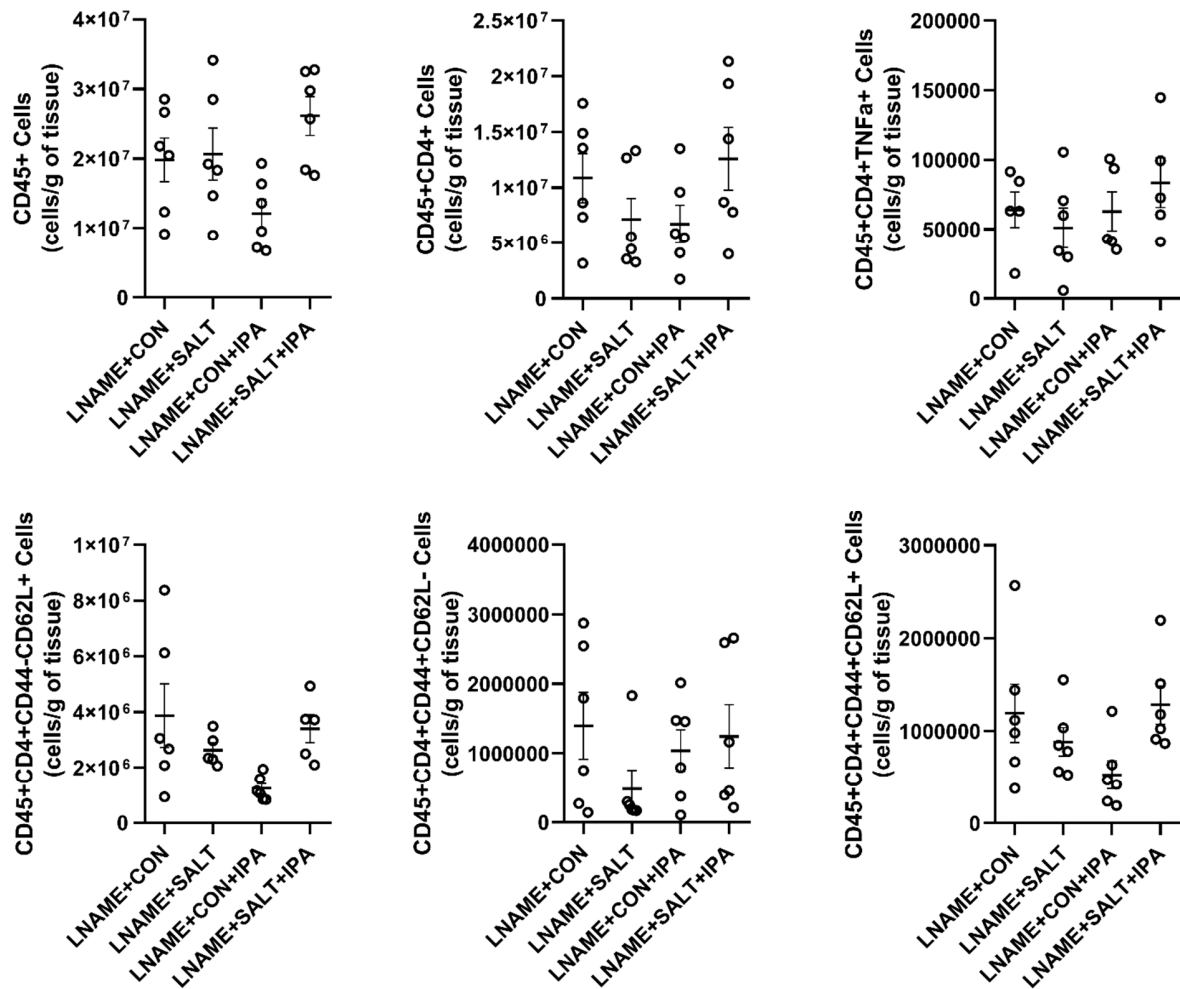

**Supplemental Figure S8. Supplementation of IPA in mice with LSHTN does not alter splenic T cell populations.** Populations of splenic immune cells, T helper cells, T helper 1 cells, naïve T cells, effector T cells, and memory T cells in mice with and without LSHTN and with and without dietary IPA supplementation (n=5-6 per group). There were no significant differences between LNAME+CON and LNAME+CON+IPA or LNAME+SALT and LNAME+SALT+IPA. Statistical analyses were performed with Student's t-test.



*Supplemental Table S1. Urinary sodium, creatinine, potassium, and chloride concentrations and sodium:potassium ratios.*

|                       | <b>Sodium<br/>(mmol/L)</b> | <b>Creatinine<br/>(mg/dL)</b> | <b>Potassium<br/>(mmol/L)</b> | <b>Chloride<br/>(mmol/L)</b> | <b>Sodium:Potassium<br/>(ratio)</b> |
|-----------------------|----------------------------|-------------------------------|-------------------------------|------------------------------|-------------------------------------|
| <b>LNAME+CON</b>      | 112 ± 11                   | 44 ± 5                        | 278 ± 15                      | 152 ± 13                     | 0.4 ± 0.03                          |
| <b>LNAME+SALT</b>     | 503 ± 108                  | 43 ± 8                        | 229 ± 20                      | 548 ± 126                    | 2.2 ± 0.4                           |
| <b>LNAME+CON+IPA</b>  | 105 ± 7                    | 32 ± 7                        | 304 ± 20                      | 163 ± 22                     | 0.3 ± 0.02                          |
| <b>LNAME+SALT+IPA</b> | 540 ± 50                   | 33 ± 5                        | 198 ± 14                      | 504 ± 103                    | 2.7 ± 0.2                           |

There were no significant differences between LNAME+CON and LNAME+CON+IPA or LNAME+SALT and LNAME+SALT+IPA. Statistical analyses were performed with Student's t-test.

*Supplemental Table S2. Flow cytometry antibody panel descriptions for mouse kidneys and spleens.*

| Panel              | CD4-Lineage T Cells                 |                    |                    |                    |                       |                      |
|--------------------|-------------------------------------|--------------------|--------------------|--------------------|-----------------------|----------------------|
| Fluorochrome       | PerCP-Cy5.5                         | PE-Cy5             | PE-Cy7             | APC                | FITC                  | Ghost Dye Violet 510 |
| Antigen            | CD45.2                              | CD4                | CD25               | CD44               | CD62L                 | Live/dead            |
| Final Conc (µg/mL) | 4 (kid)<br>1 (spl)                  | 4 (kid)<br>1 (spl) | 4 (kid)<br>1 (spl) | 4 (kid)<br>1 (spl) | 10 (kid)<br>2.5 (spl) |                      |
| Dilution Factor    | 1:50 (kidney)<br>1:200 (spleen)     |                    |                    |                    |                       | 1:400                |
| Clone              | 104                                 | RM4-5              | PC61               | IM7                | MEL-14                |                      |
| Manufacturer       | BD                                  | BioLegend          | BioLegend          | BioLegend          | BioLegend             | Tonbo                |
| Panel              | CD4-Lineage T Cells (Intracellular) |                    |                    |                    |                       |                      |
| Fluorochrome       | AlexaFluor 700                      |                    | BV421              |                    | APC-Cy7               |                      |
| Antigen            | FoxP3                               |                    | TNFa               |                    | IL17a                 |                      |
| Final Conc (µg/mL) | 4 (kid)<br>1 (spl)                  |                    | 4 (kid)<br>1 (spl) |                    | 4 (kid)<br>1 (spl)    |                      |
| Dilution Factor    | 1:50 (kidney)<br>1:200 (spleen)     |                    |                    |                    |                       |                      |
| Clone              | FJK-16s                             |                    | MP6-XT22           |                    | TC11-18H10.1          |                      |
| Manufacturer       | eBioscience                         |                    | BD                 |                    | BioLegend             |                      |

Abbreviations: APC = allophycocyanin; FITC = fluorescein isothiocyanate; PE = phycoerythrin; PerCP-Cy5.5 = peridinin chlorophyll protein complex cyanine 5.5
